# Supplementary material for: Applications and advancements of CRISPR-Cas in the treatment of lung cancer
Source: Front Cell Dev Biol. 2023 Dec 11;11:1295084. doi: 10.3389/fcell.2023.1295084 (PMC10768725; doi:10.3389/fcell.2023.1295084)
Supplement: Supplementary file 2 [file Table1.xlsx]

## Sheet: Table 1
Table1. CRISPR technology in functional studies for genes concerned with tumor initiation and development of lung cancer.
Targets	Knockout/other	Edited objects	Outcomes after editing	Cancer types	Function	PMID
EGFR L858R	Knockout	H1975 and A549 cells; xenograft mouse model of human lung cancer	Inhibition of tumor growth and significant decrease of tumor size in xenograft mouse model	LUAD	OG	28575452
EGFR L858R	Knockout	H1650 cells	Reduced cell proliferation; decreased tumor load in vivo	LUAD	OG	29748615
KRAS G12S	Knockout and knockdown	A549 and H2228 cells; xenograft mouse models of two cell lines	Retarded cell proliferation and tumor growth	LUAD	OG	32308773
FAK	Knockout	Mutant KRAS cells (A549 and H460 cells)	Sustainable DNA damage and susceptibility to radiotherapy	NSCLC	OG	27220963
HDAC2	rs13213007 Base editing	HEK293 cells	Facilitated cell proliferation,migration, and invasion in vitro by increasing c-Myc and cyclin D1 levels	NSCLC	OG	37401867
RSF1	Knockout	H460 and H1299 cells	G1 phase arrest; increased cell apoptosis; decreased migration and cell proliferation	LC	OG	29258089
CD38	Knockout	A549 cells and xenograft mouse model	Inhibited cell growth, invasion and xenograft growth in nude mice.	LUAD	OG	29228209
CTNND2	Knockout	Lewis lung cells and xenograft in C57BL/6 mice	Depletion of δ-catenin proteins; Loss of tumorigenic and metastatic abilities in vivo	LUAD	OG	29251319
GRM8	Activation	EBC-1 and SK-MES-1 cells;	Enhanced cell proliferation by suppressing the PKA activities and activating MAPK pathway	LUSC	OG	30391781
	A112G Point mutation	293T cells
ABCG2	Knockout	A549 cells	EGFP knock-in generating ABCG2 knockout and in situ tagged ABCG2 reporter cells, which dissects the expression pattern of ABCG2 under medications such as HDAC inhibitors, hypoxia-mimicking agents and glucocorticoids	LUAD	OG	32142727
SMAD3/SMAD4	Knockout	NSCLC cells	Impaired TGF-β-induced EMT and metastasis through reducing MYOCD mRNA expression	NSCLC	OG	32029901
CAMKK1	rs7214723 T > C mutation	A549 and H358 cells	Significantly inhibited cell proliferation and migration; promoted cell apoptosis	LUAD	OG	34868969
YAP1	Knockout	H69AR cells; xenograft in Rag2−/−:Jak3−/− mice	Suppressed cell proliferation and migration	SCLC	OG	35072899
IGF1R	Knockout	HCC827 cells	Amplification of MET gene; increased epithelial signature	LUAD	OG	28418902
MET	Exon 14 depletion	H292, H125 and A549 cells; xenograft mouse model	Boosted migration and metastasis in vivo; Significantly increased tumor growth than MET	NSCLC	OG	35078819
MFN2	Knockout	A549 cells; tumor xenograft model	Enhanced cell viability, colony formation, and invasion in vitro and in vivo	LUAD	TS	28176801
KEAP1	Knockout	A mouse model of KRAS-driven LUAD	Hyperactivation of NRF2; facilitating KRAS-driven LUAD in mice	LUAD	TS	28967920
miR-1304	Knockout	A549 cells	Promoted tumor growth by increasing the protein and mRNA expression level of heme oxygenase-1	LUAD	TS	27641735
GOT1	Knockout	A549 cells	Induced cell death upon glucose deprivation	LUAD	TS	29751795
Lkb1 substrates including SIK1 and SIK2	Knockout	Kras-driven mouse model of LUAD	Rapid lung tumor growth	LUAD	TS	31350327
PTEN	Knockout	A549 and H460 cells; xenograft model in nude mice	Faster growth, migration, invasion and higher metastatic potential in vivo and vitro	NSCLC	TS	30885348
FGA	Knockout	H1299 and A549 cells; A549 xenograft model	Facilitated tumor growth and metastasis via integrin-AKT pathway	NSCLC	TS	32205365
USP15	Knockout	H1299 and A549 cells	Increases of cancer migration and invasion by TRAF6-BECN1 signaling axis in response to TLR4 stimulation	NSCLC	TS	35422093
HPGDS	Knockout	A549 cells	Enhanced lipid synthesis and invasion	LUAD	TS	36324576
Abbreviations: EGFR, epidermal growth factor receptor; FAK, focal adhesion kinase; RSF-1, remodeling and spacing factor 1; GRM8, Metabotropic Receptor 8; CAMKK1, Ca2+/calmodulin-dependent protein kinase kinase 1; YAP1, Yes-associated protein 1; IGF-1R, insulin-like growth factor 1 receptor; MFN2, mitochondrial GTPase mitofusin-2; KEAP1, Kelch-like ECH-associated protein 1; GOT1, Glutamate oxaloac…
